# Supplementary material for: Heteroleptic samarium complexes with high quantum yields for temperature sensing applications
Source: Royal Society of Chemistry journal article supplement (doi:10.1039/d3dt03160h), 2023-12-15
Supplement: d3dt03160h1.pdf [file d3dt03160h1.pdf]

# Supplementary Information

## Heteroleptic Samarium Complexes with High Quantum Yields for Temperature Sensing Applications

**Asgar Ali,<sup>\*1</sup> Zubair Ahmed,<sup>2</sup> Khalid Iftikhar<sup>1</sup> and Rahisuddin<sup>\*1</sup>**

<sup>1</sup>Lanthanide Research Laboratory, Department of Chemistry, Jamia Millia Islamia, New Delhi 110025, India. E-mail corresponding: [asgar.chemistry@gmail.com](mailto:asgar.chemistry@gmail.com), [rahisuddin@jmi.ac.in](mailto:rahisuddin@jmi.ac.in)

<sup>2</sup>Department of Chemistry, School of Basic and Applied Sciences, Galgotias University, Greater Noida, India.

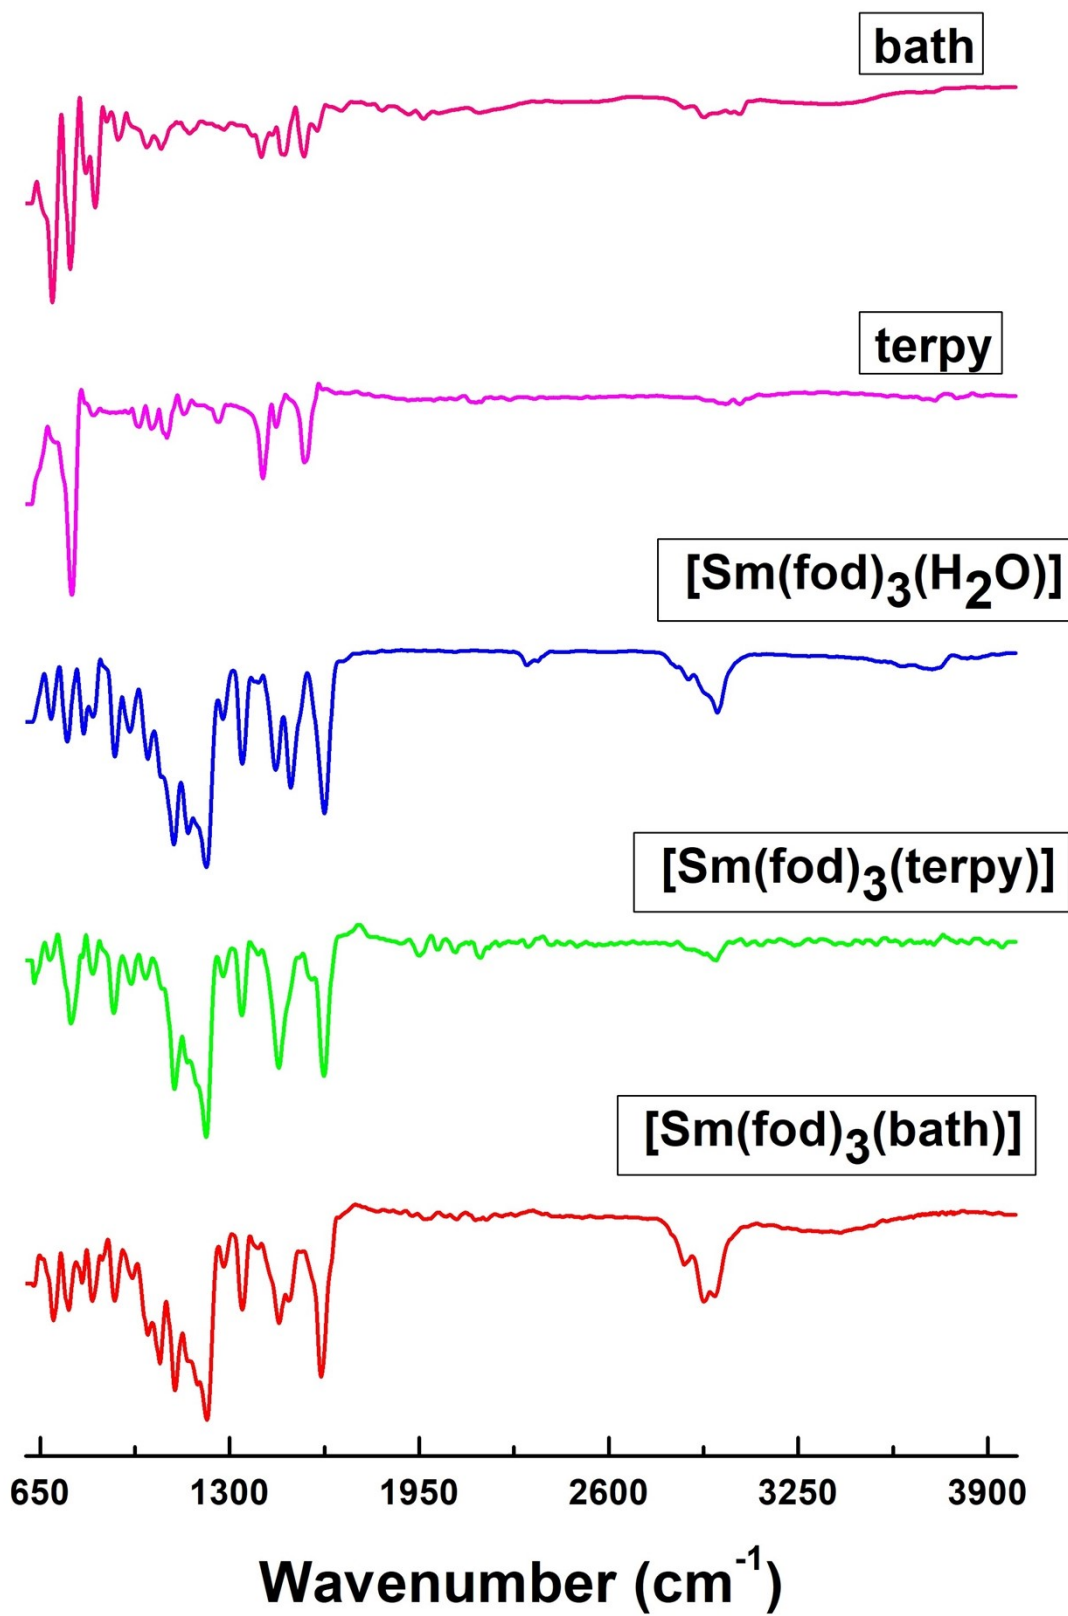

Figure S1 FTIR spectra of ligand and complexes.

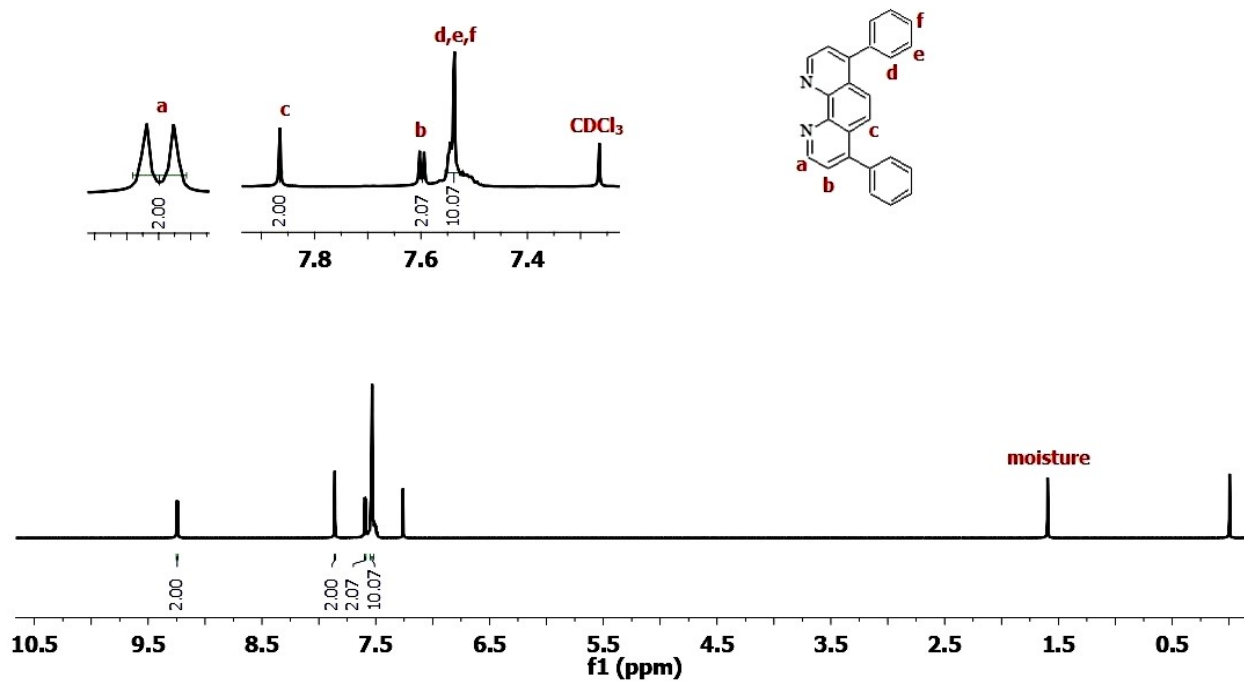

Figure S2  $^1\text{H}$  NMR spectrum of bath in  $\text{CDCl}_3$ .

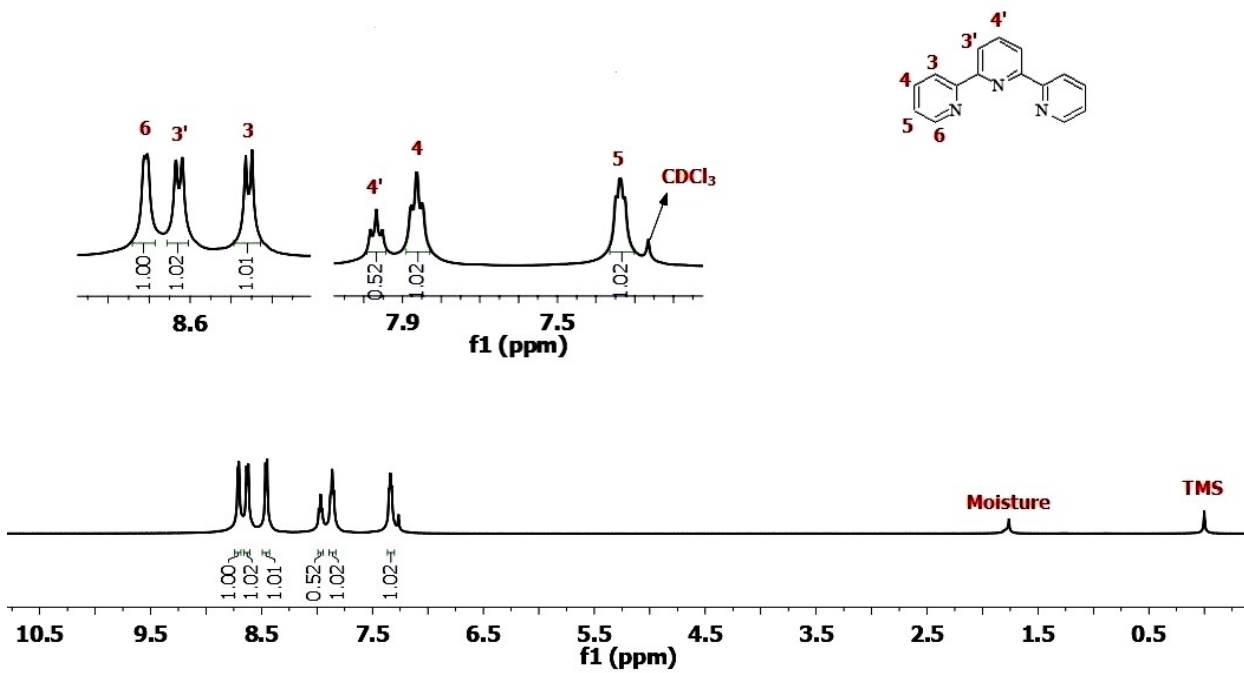

Figure S3  $^1\text{H}$  NMR spectrum of terpy in  $\text{CDCl}_3$ .

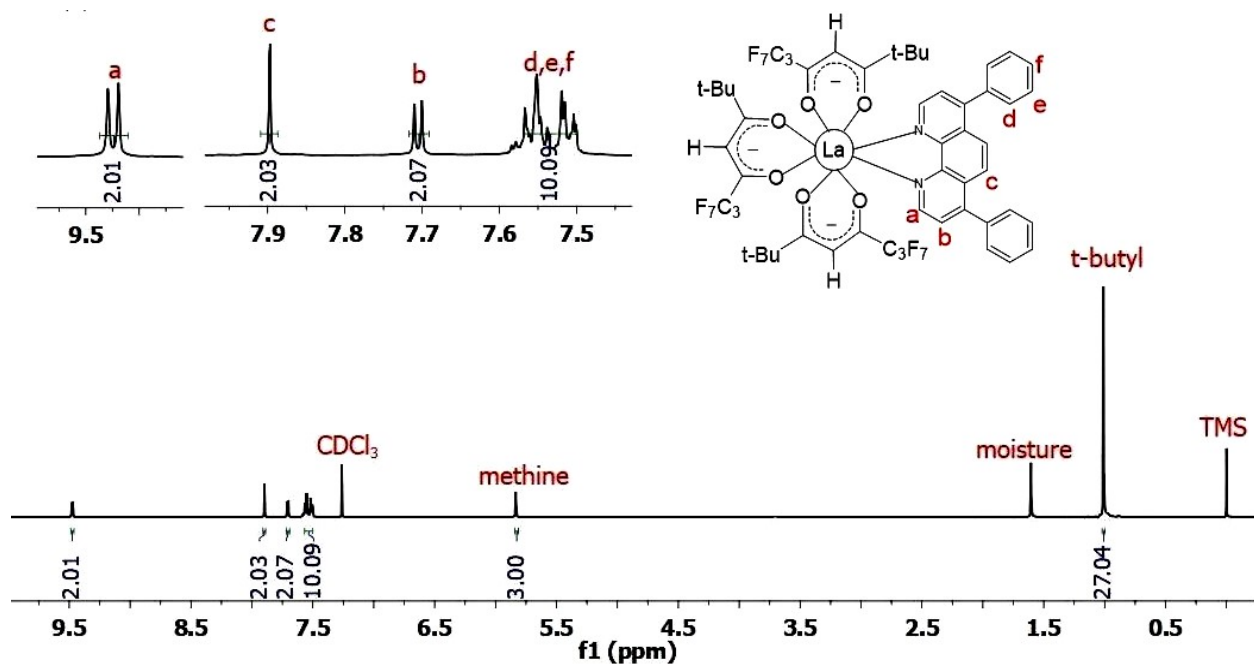

Figure S4  $^1\text{H}$  NMR spectra of  $[\text{La}(\text{fod})_3(\text{bath})]$  in  $\text{CDCl}_3$ .

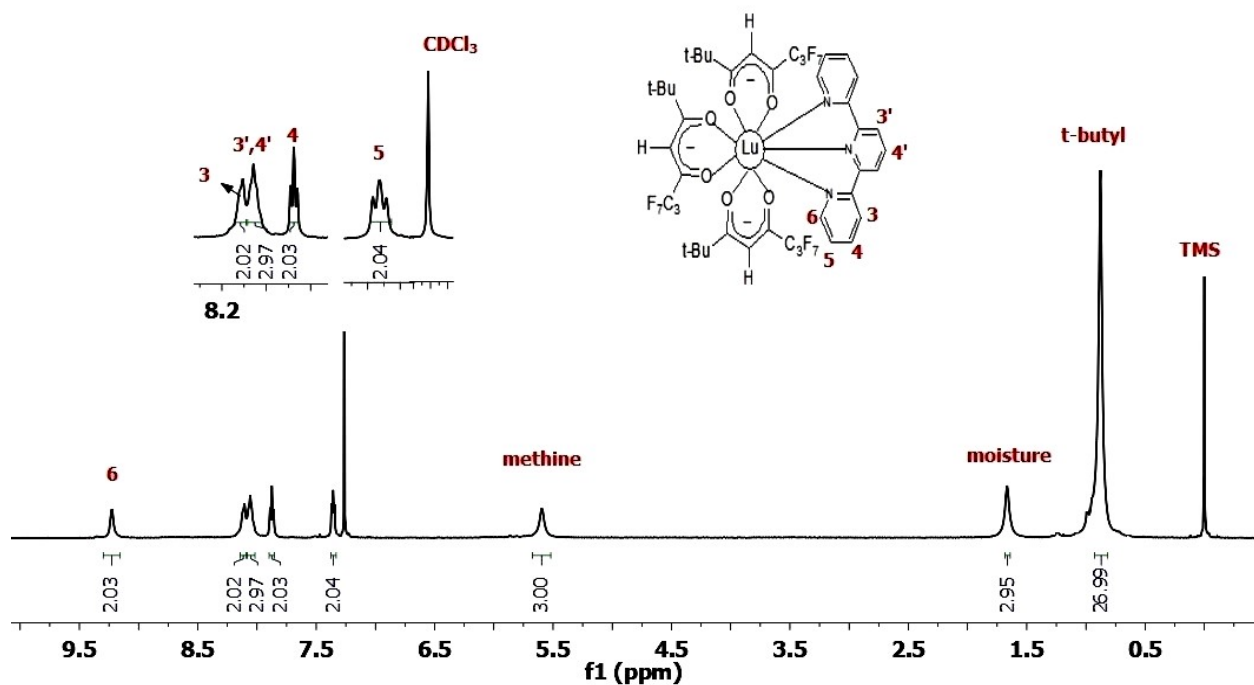

Figure S5  $^1\text{H}$  NMR spectra of  $[\text{Lu}(\text{fod})_3(\text{terpy})]$  in  $\text{CDCl}_3$ .

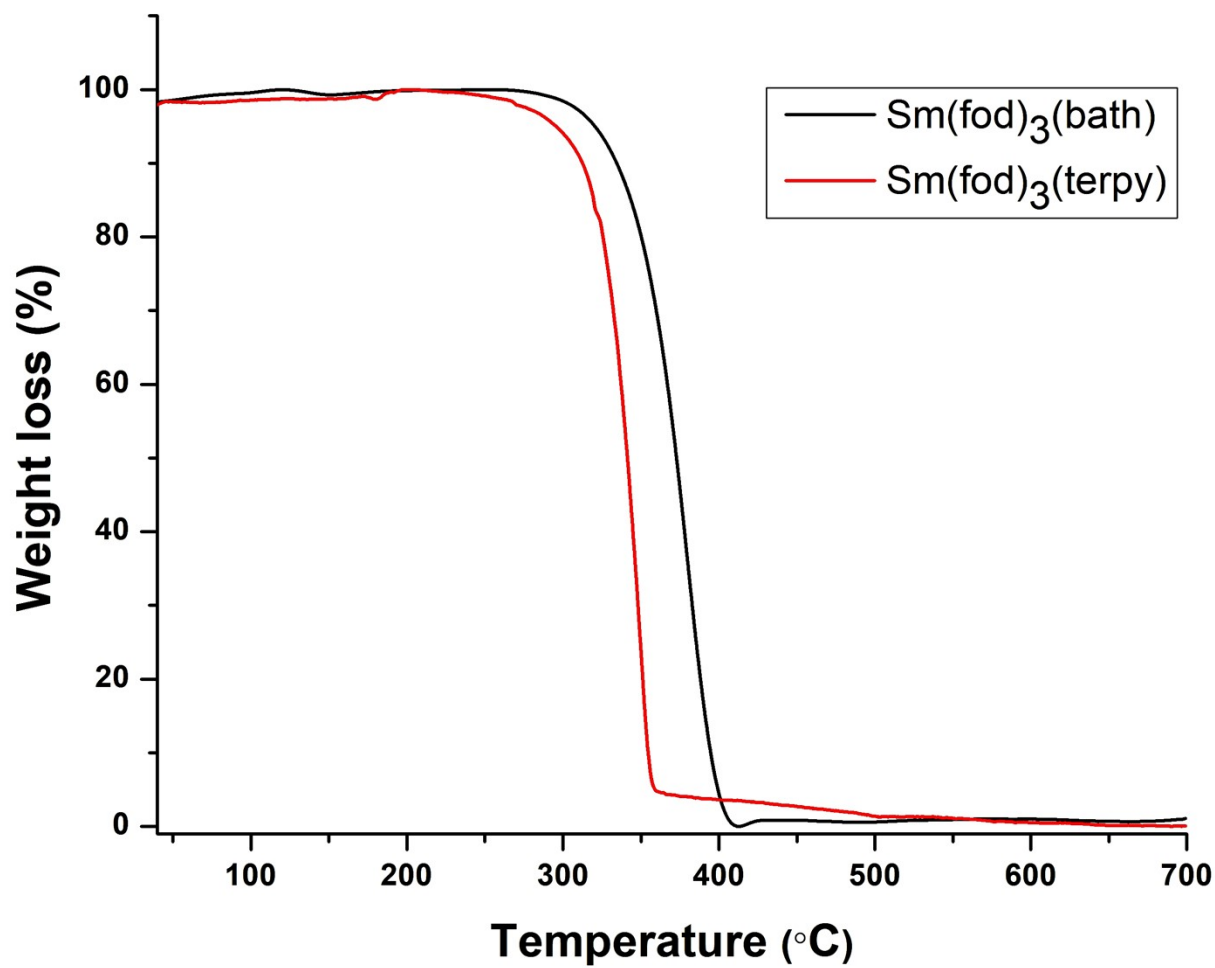

Figure S6 Thermogram of the complexes.

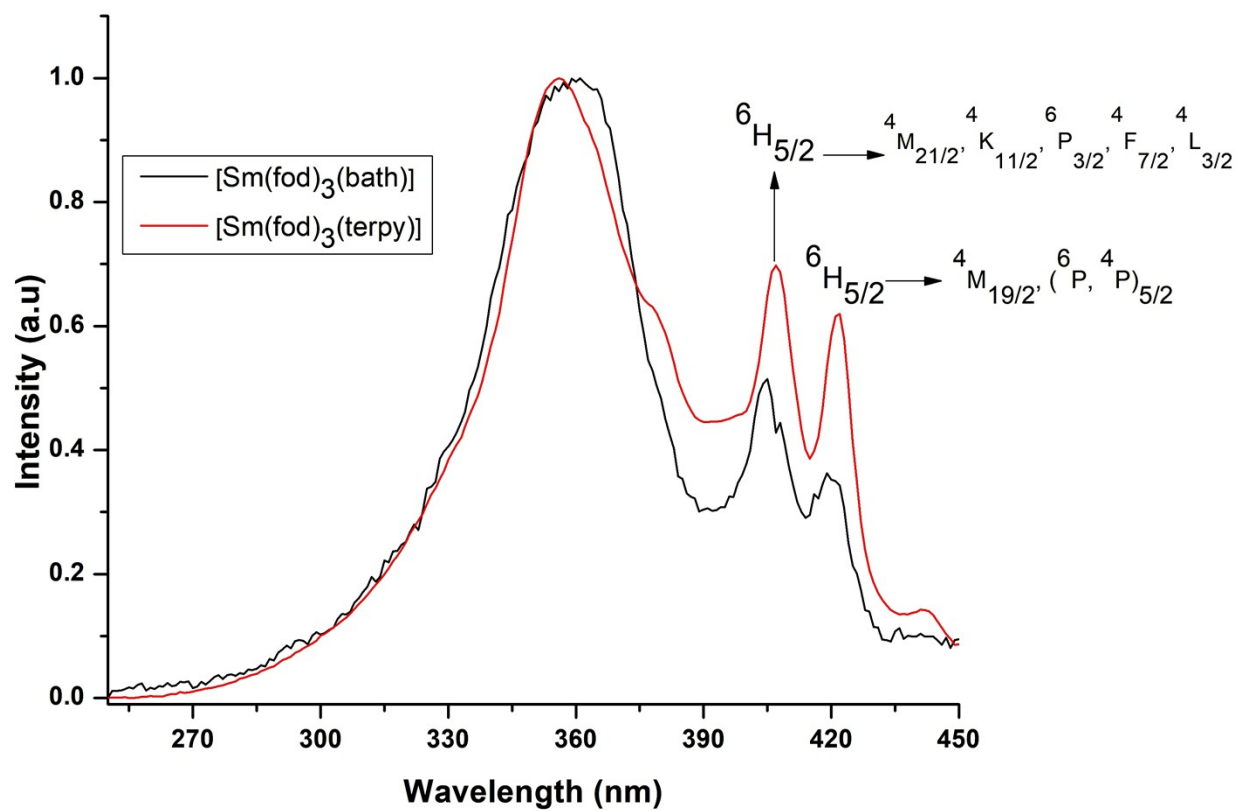

**Figure S7** Excitation spectra of the complexes in solid state

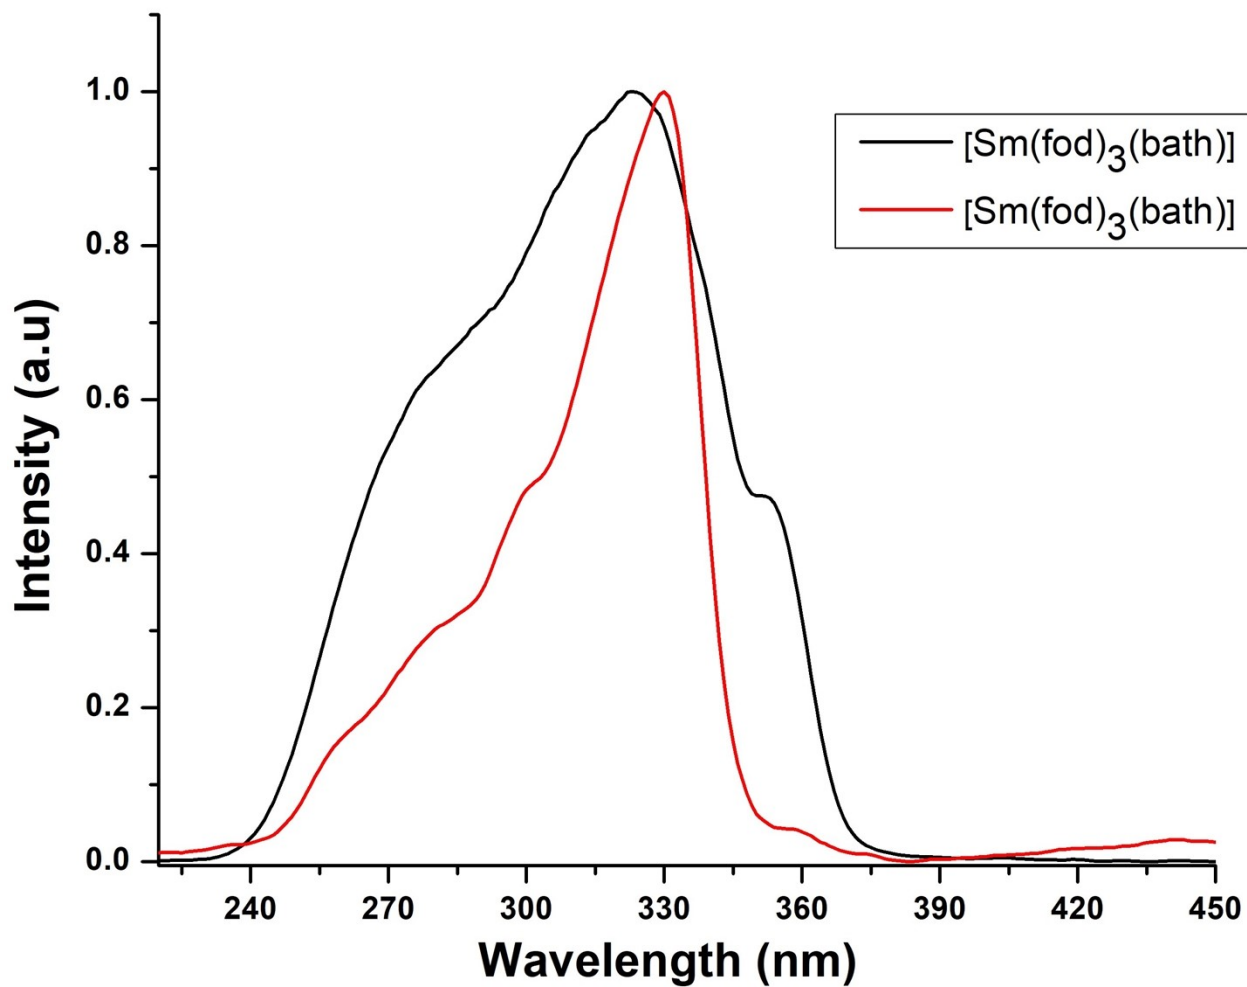

Figure S8 Excitation of the complexes in 3 % PMMA thin film

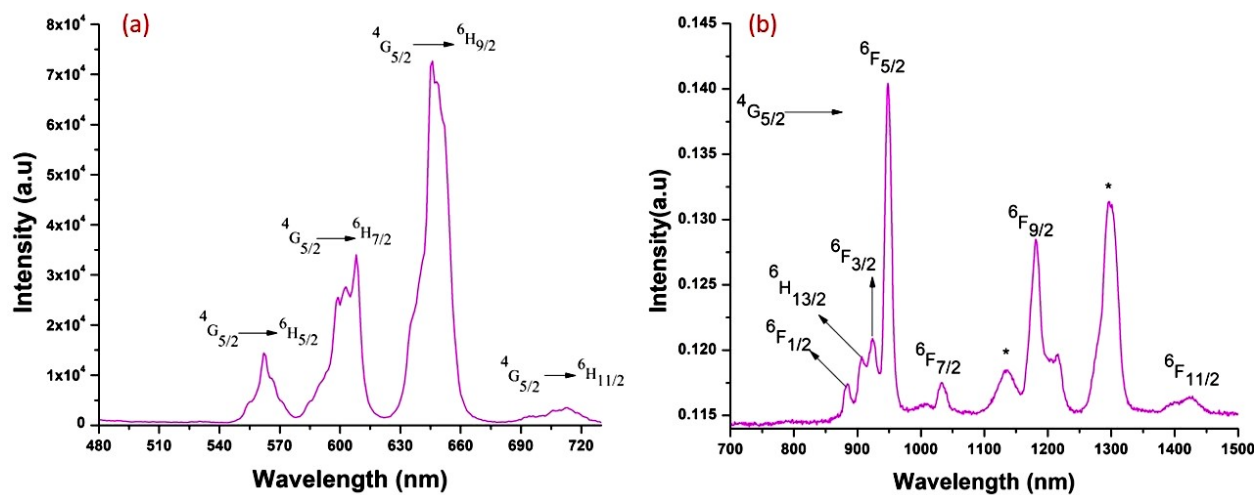

Figure S9 (a) Visible-emission and (b) NIR-emission of the  $[\text{Sm}(\text{fod})_3(\text{bath})]$  in solid state

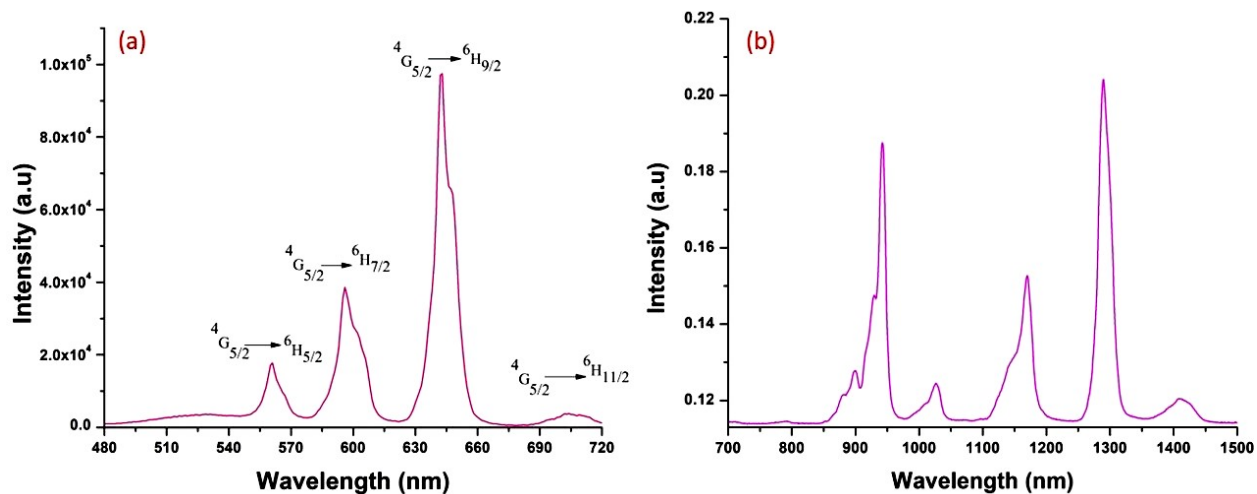

**Figure S10** (a) Visible-emission and (b) NIR-emission of the [Sm(fod)<sub>3</sub>(terpy)] in solid state

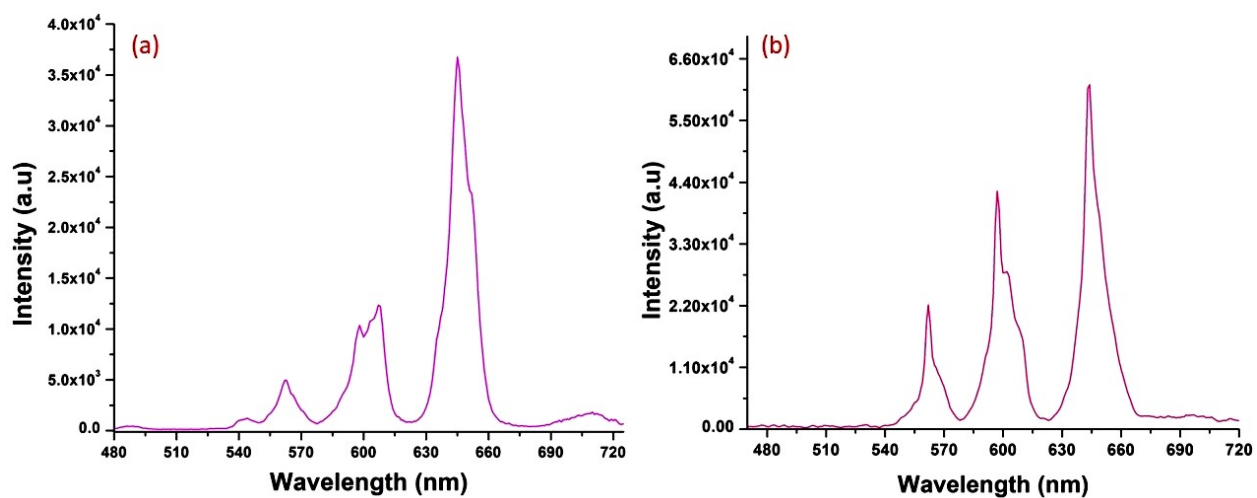

**Figure S11** Emission spectra of (a) [Sm(fod)<sub>3</sub>(bath)] and (b) [Sm(fod)<sub>3</sub>(terpy)] in 3% PMMA thin film.



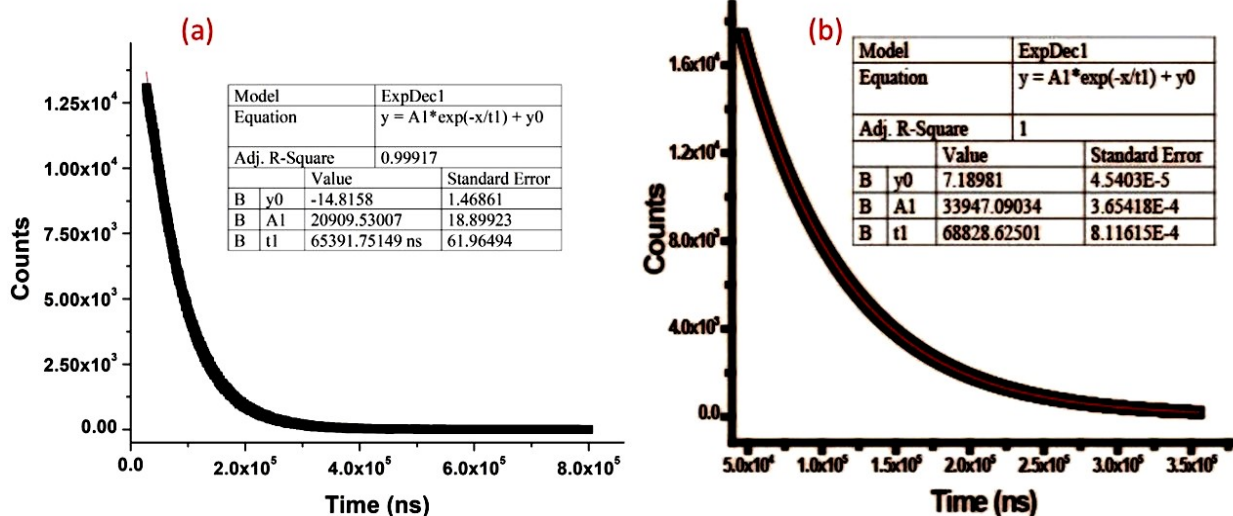

**Figure S12** Emission decay time of (a) [Sm(fod)<sub>3</sub>(bath)] and (b) [Sm(fod)<sub>3</sub>(terpy)] in chloroform.

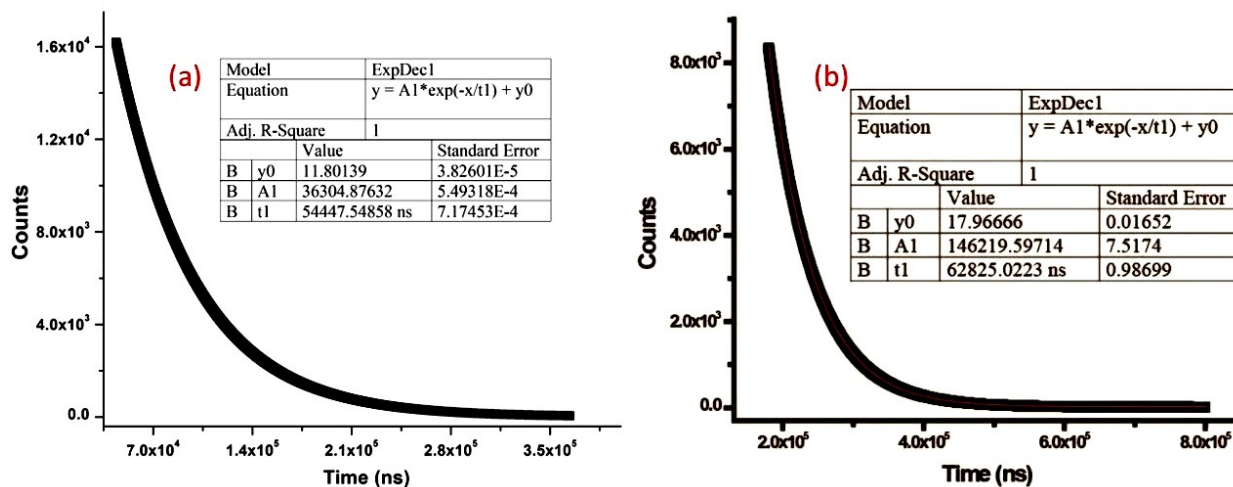

**Figure S13** Emission decay time of (a) [Sm(fod)<sub>3</sub>(bath)] and (b) [Sm(fod)<sub>3</sub>(terpy)] in 3% PMMA thin film.

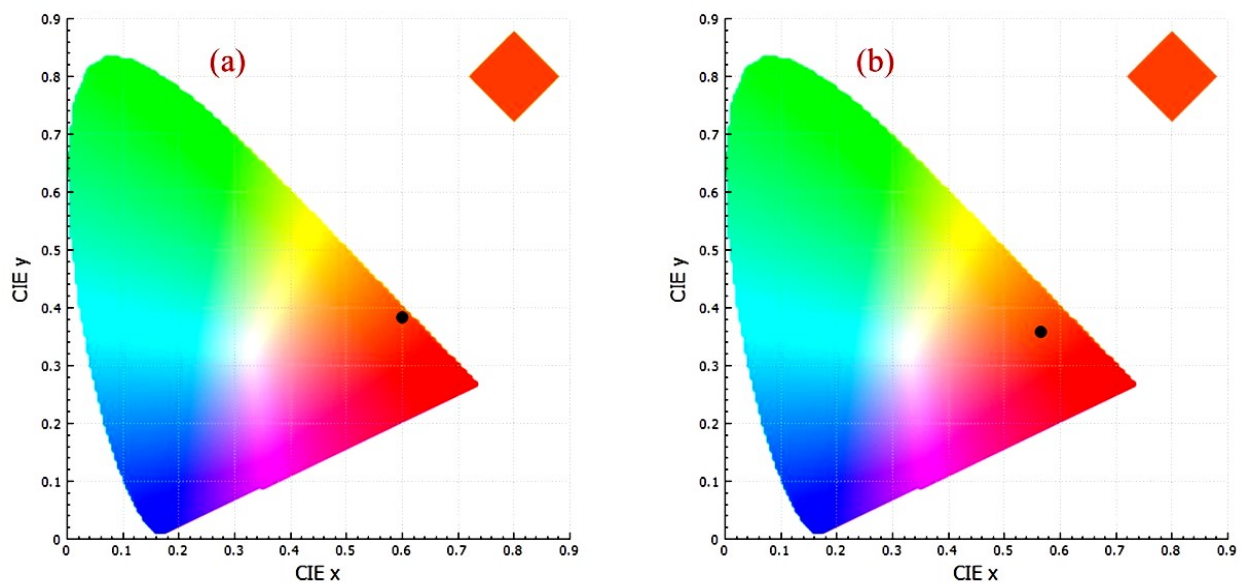

**Figure S14** CIE diagram of (a) [Sm(fod)<sub>3</sub>(bath)] and (b) [Sm(fod)<sub>3</sub>(terpy)] in chloroform.

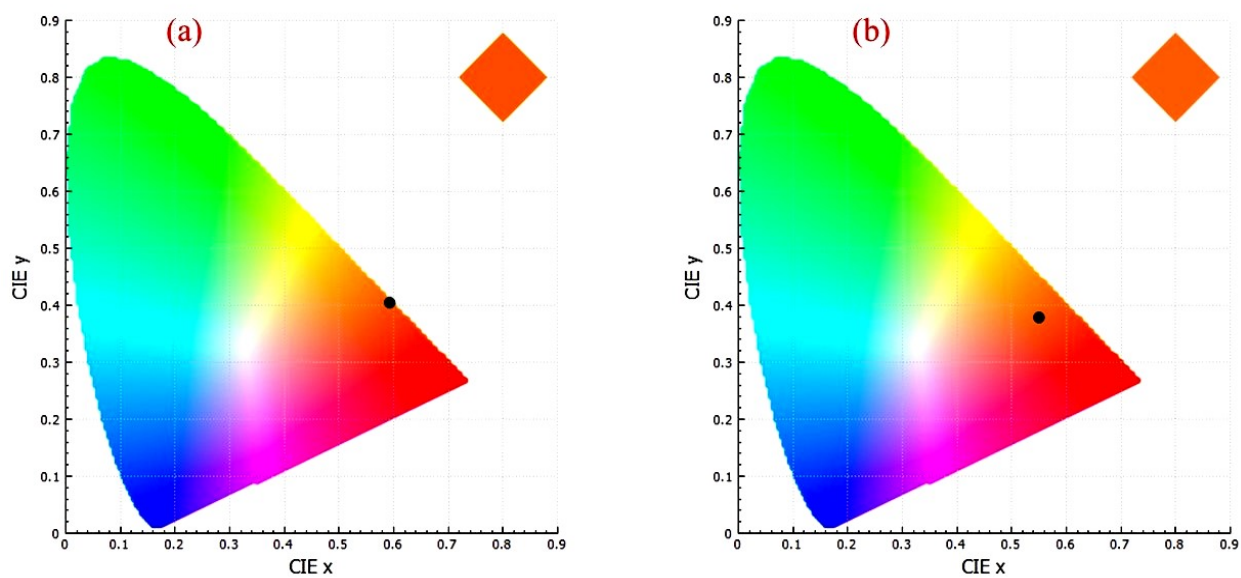

**Figure S15** CIE diagram of (a) [Sm(fod)<sub>3</sub>(bath)] and (b) [Sm(fod)<sub>3</sub>(terpy)] in 3% PMMA thin film.

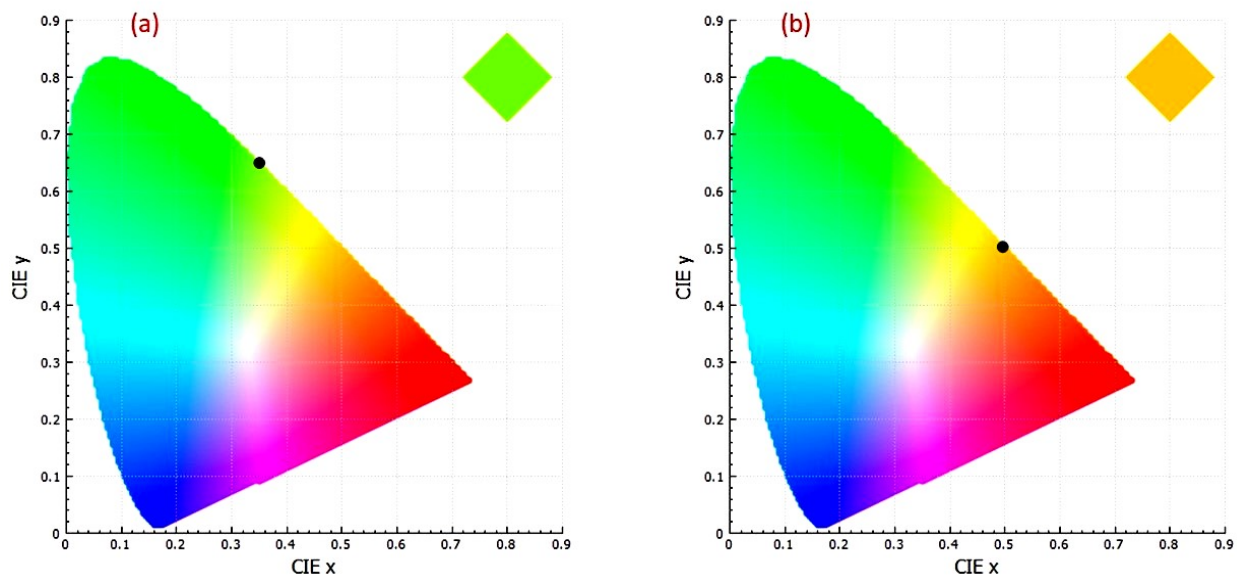

**Figure S16** CIE diagram of  $[\text{Sm}(\text{fod})_3(\text{bath})]$  of NIR-region in (a) chloroform and (b) solid state

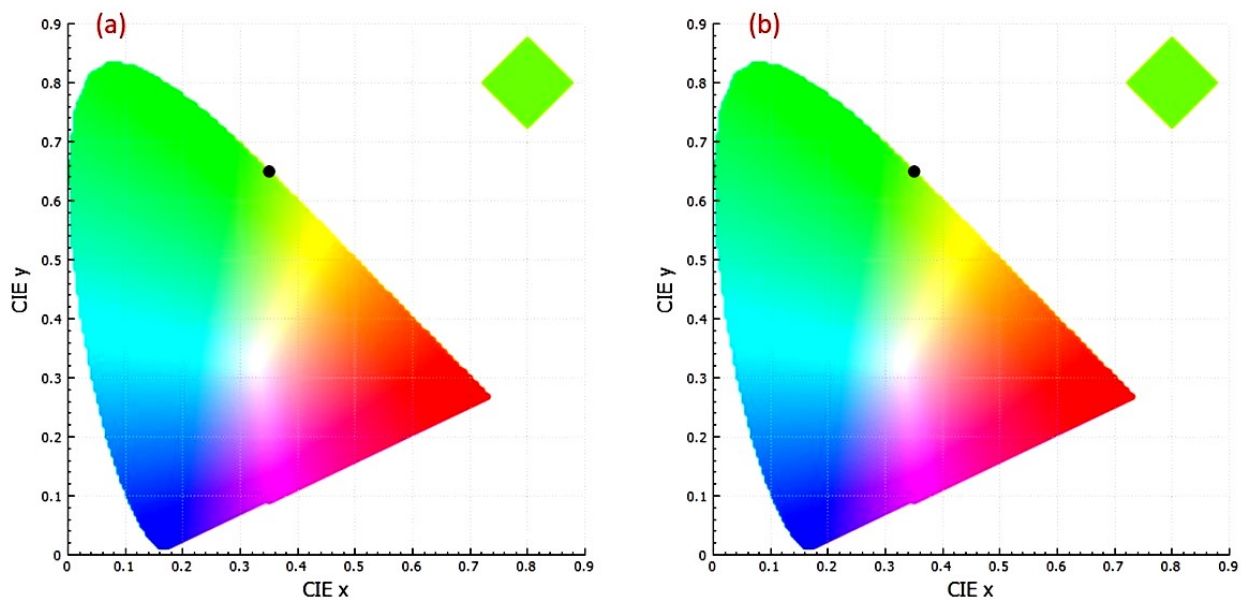

**Figure S17** CIE diagram of  $[\text{Sm}(\text{fod})_3(\text{terpy})]$  of NIR-region in (a) chloroform and (b) solid state

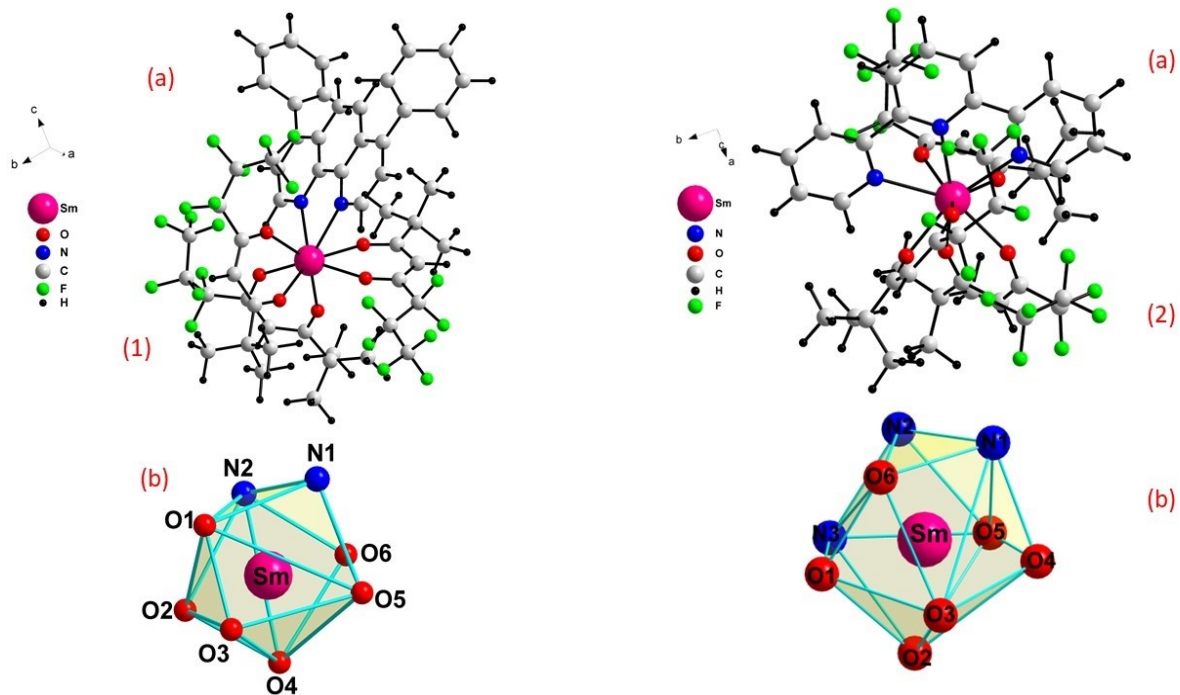

**Figure S18** (a) Ground state geometry obtained using Sparkle/PM7 and (b) coordination polyhedron around the metal ion of (1)  $[\text{Sm}(\text{fod})_3(\text{bath})]$  and (2)  $[\text{Sm}(\text{fod})_3(\text{terpy})]$ .

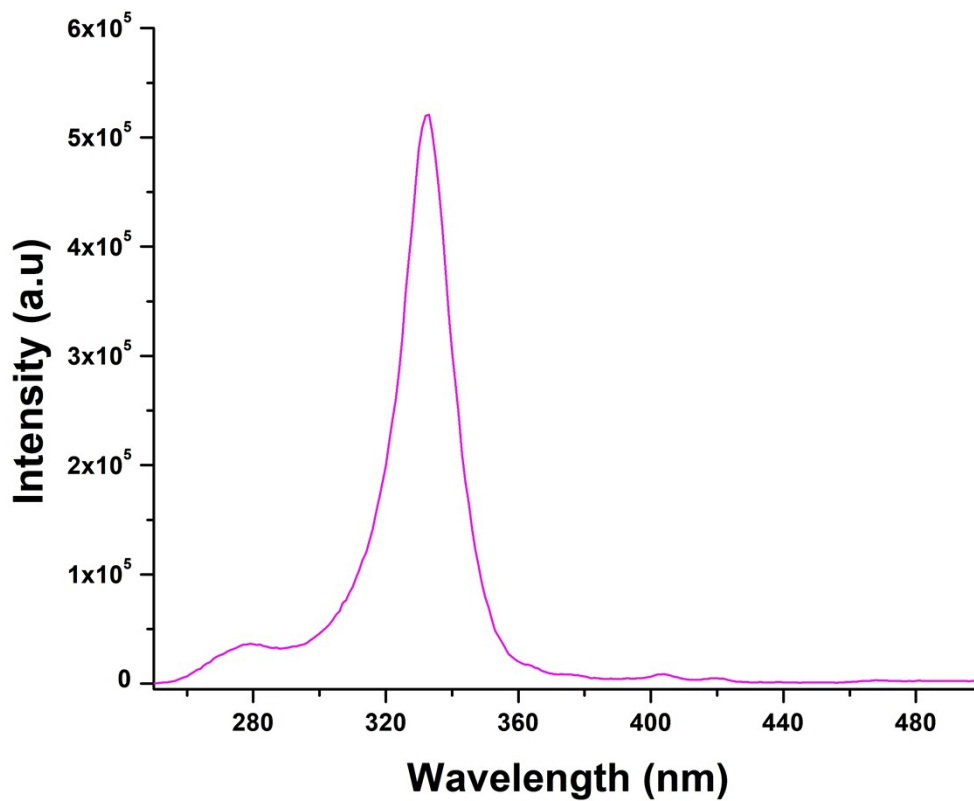

**Figure S19** Excitation spectra of  $[\text{Sm}(\text{fod})_3(\text{H}_2\text{O})]$  in chloroform

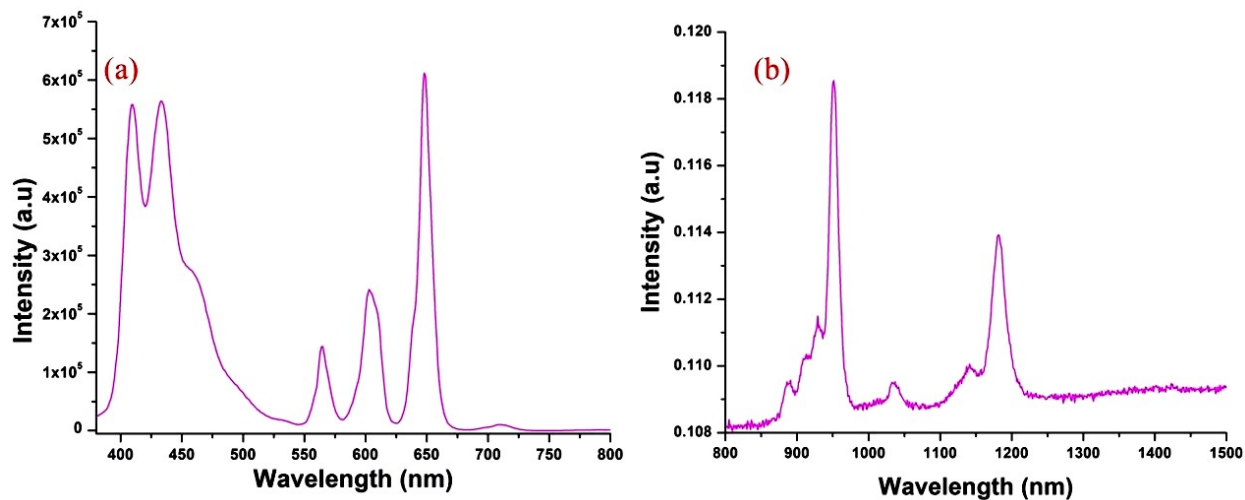

Figure S20 (a) Visible and (b) Near infra-red emission spectra of  $[\text{Sm}(\text{fod})_3(\text{H}_2\text{O})]$  in chloroform

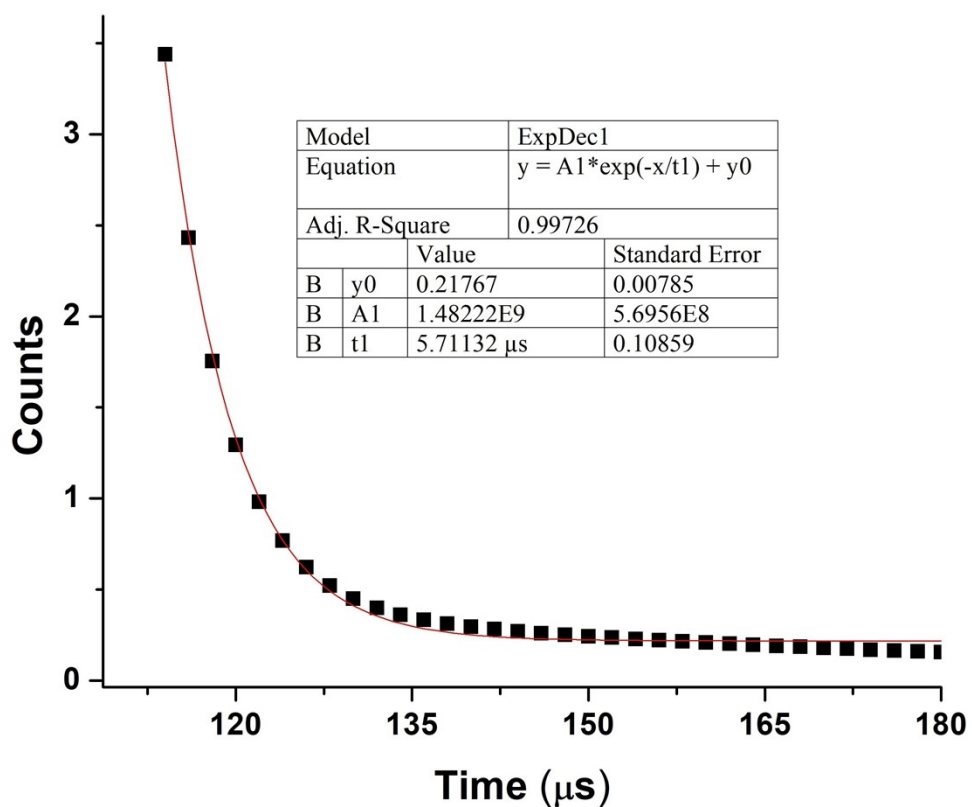

Figure S21 Excitation decay profile of  $[\text{Sm}(\text{fod})_3(\text{H}_2\text{O})]$  in chloroform

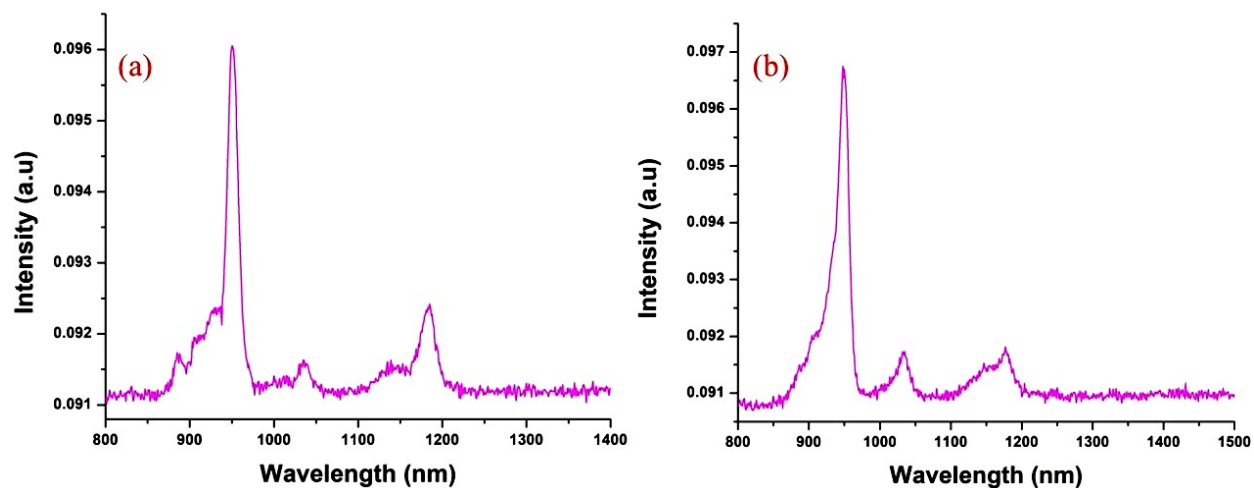

**Figure S22** NIR emission spectra of (a)  $[\text{Sm}(\text{fod})_3(\text{bath})]$  and (b)  $[\text{Sm}(\text{fod})_3(\text{terpy})]$  in 3% PMMA thin film.

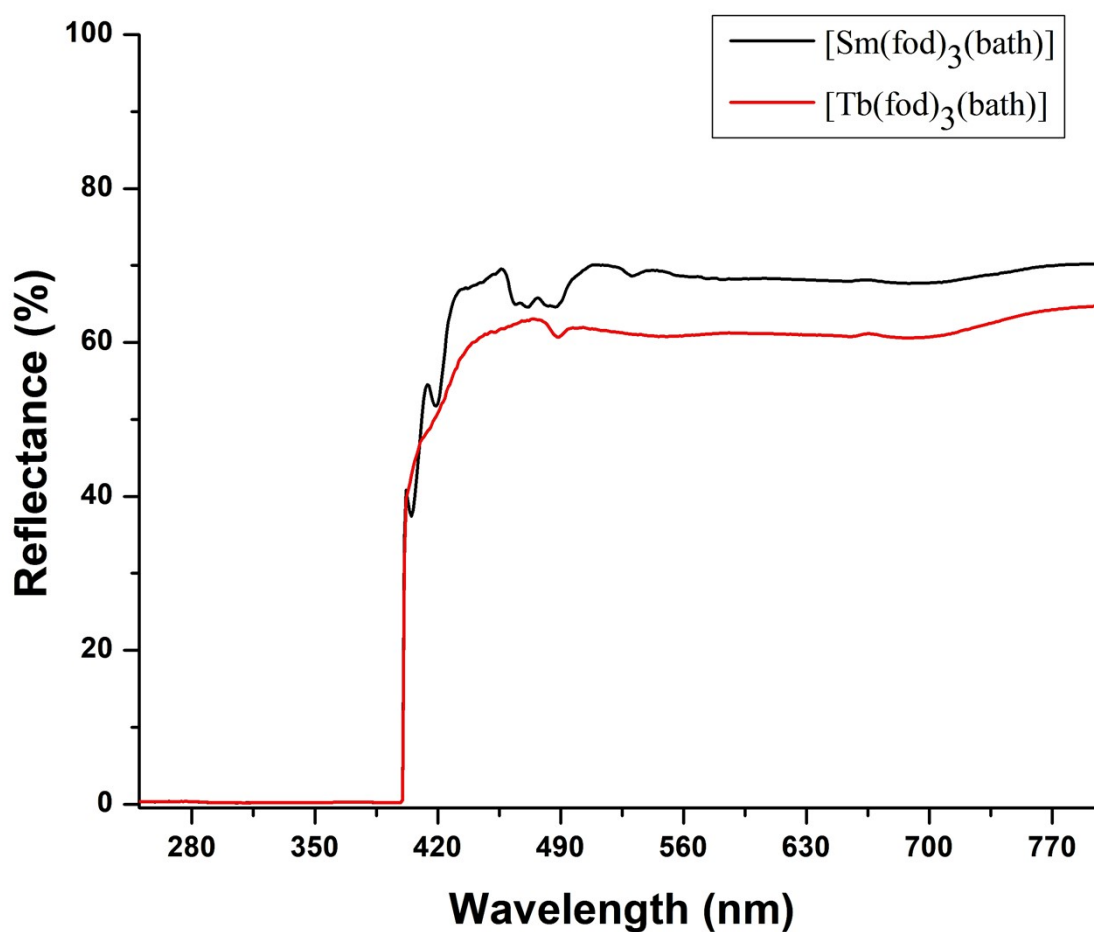

**Figure S23** Diffuse reflectance spectra of bathophenanthroline (bath) complexes.



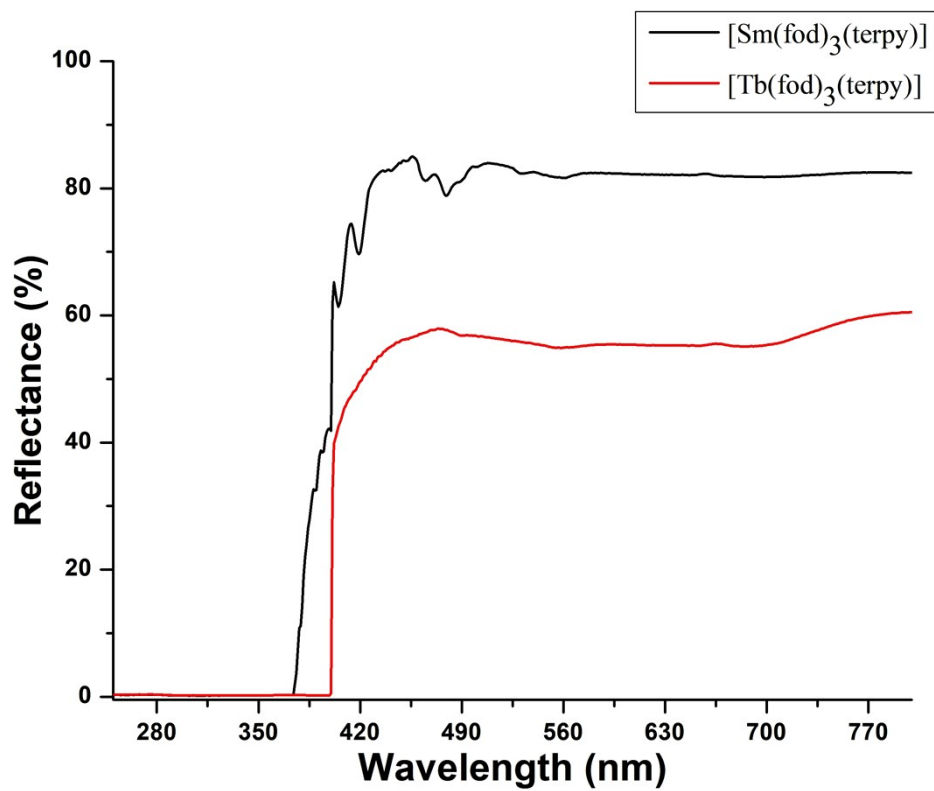

Figure S24 Diffuse reflectance spectra of terpyridine (terpy) complexes.

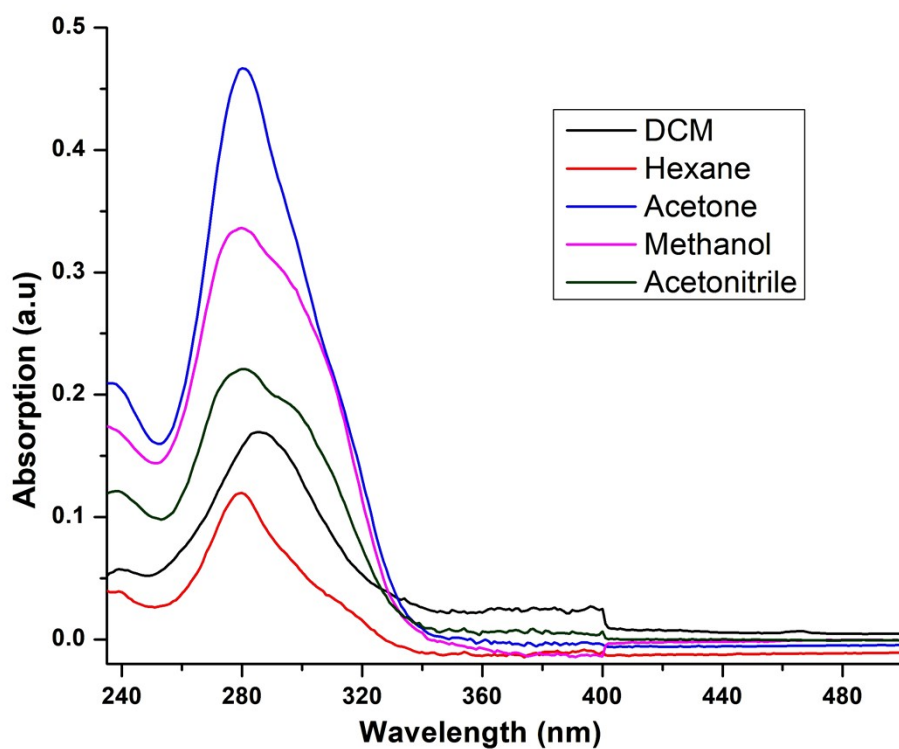

Figure S25 Absorption spectra of  $[\text{Sm}(\text{fod})_3(\text{bath})]$  in different solvents.

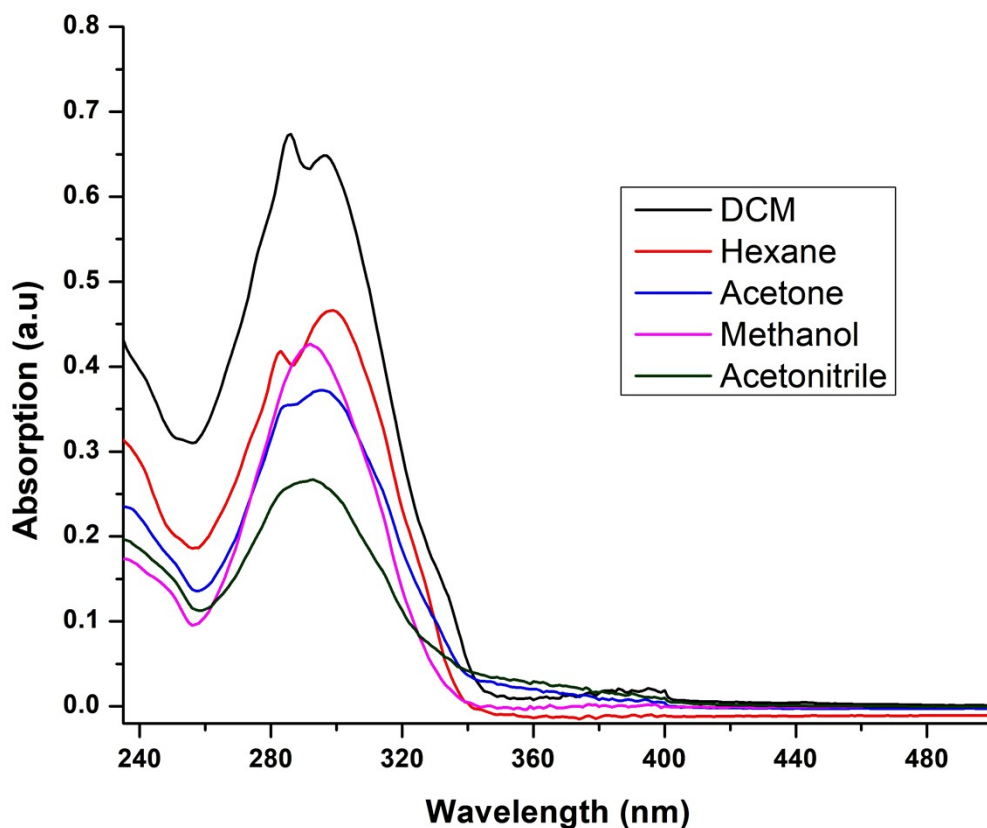

Figure S26 Absorption spectra of  $[\text{Sm}(\text{fod})_3(\text{terpy})]$  in different solvents.

Table S1 Selected bond angles ( $^\circ$ ) for  $[\text{Sm}(\text{fod})_3(\text{bath})]$  complex.

| Unit 1          |            |                 |            | Unit 2            |            |                   |            |
|-----------------|------------|-----------------|------------|-------------------|------------|-------------------|------------|
| O(1)-Sm(1)-N(1) | 141.43(11) | O(3)-Sm(1)-N(2) | 76.01(12)  | O(7)-Sm(2)-O(8)   | 70.36(12)  | O(10)-Sm(2)-N(3)  | 79.32(14)  |
| O(1)-Sm(1)-N(2) | 78.88(12)  | O(4)-Sm(1)-O(1) | 134.01(13) | O(7)-Sm(2)-O(9)   | 143.87(12) | O(10)-Sm(2)-N(4)  | 72.42(14)  |
| O(2)-Sm(1)-O(1) | 70.77(12)  | O(4)-Sm(1)-O(6) | 144.46(12) | O(7)-Sm(2)-N(3)   | 107.82(14) | O(11)-Sm(2)-O(7)  | 78.48(14)  |
| O(2)-Sm(1)-O(4) | 76.13(12)  | O(4)-Sm(1)-N(1) | 74.36(12)  | O(7)-Sm(2)-N(4)   | 81.00(14)  | O(11)-Sm(2)-O(8)  | 84.07(13)  |
| O(2)-Sm(1)-O(5) | 85.28(12)  | O(4)-Sm(1)-N(2) | 122.04(12) | O(8)-Sm(2)-O(9)   | 78.98(13)  | O(11)-sm(2)-O(9)  | 79.81(12)  |
| O(2)-Sm(1)-O(6) | 109.90(13) | O(5)-Sm(1)-O(1) | 130.48(12) | O(8)-Sm(2)-N(3)   | 71.43(13)  | O(11)-Sm(2)-N(3)  | 150.08(12) |
| O(2)-Sm(1)-N(1) | 147.45(12) | O(5)-Sm(1)-O(4) | 75.78(12)  | O(8)-Sm(2)-N(4)   | 113.07(14) | O(11)-Sm(2)-N(4)  | 146.76(12) |
| O(2)-Sm(1)-N(2) | 148.26(12) | O(5)-Sm(1)-O(6) | 70.07(11)  | O(9)-Sm(2)-N(3)   | 78.88(13)  | O(12)-Sm(2)-O(7)  | 77.47(13)  |
| O(3)-Sm(1)-O(1) | 77.95(13)  | O(5)-Sm(1)-N(1) | 74.46(12)  | O(9)-Sm(2)-N(4)   | 129.88(13) | O(12)-Sm(2)-O(8)  | 142.83(12) |
| O(3)-Sm(1)-O(2) | 88.54(13)  | O(5)-Sm(1)-N(2) | 122.69(13) | O(10)-Sm(2)-O(7)  | 145.12(12) | O(12)-Sm(2)-O(9)  | 121.71(14) |
| O(3)-Sm(1)-O(4) | 70.07(12)  | O(6)-Sm(1)-O(1) | 78.20(12)  | O(10)-Sm(2)-O(8)  | 141.10(11) | O(12)-Sm(2)-O(11) | 71.49(13)  |
| O(3)-Sm(1)-O(5) | 145.78(12) | O(6)-Sm(1)-N(1) | 87.11(12)  | O(10)-Sm(2)-O(9)  | 70.52(12)  | O(12)-Sm(2)-N(3)  | 138.19(14) |
| O(3)-Sm(1)-O(6) | 142.73(11) | O(6)-Sm(1)-N(2) | 71.58(12)  | O(10)-Sm(2)-O(11) | 112.69(14) | O(12)-Sm(2)-N(4)  | 78.73(14)  |
| O(3)-Sm(1)-N(1) | 94.07(13)  | N(2)-Sm(1)-N(1) | 62.62(12)  | O(10)-Sm(2)-O(12) | 75.54(12)  | N(4)-Sm(2)-N(3)   | 61.96(13)  |



**Table S2** Selected bond lengths (Å) and bond angles (°) of [Sm(fod)<sub>3</sub>(terpy)]

|                 |          |                 |          |                 |          |                 |          |
|-----------------|----------|-----------------|----------|-----------------|----------|-----------------|----------|
| Sm(1)-O(3)      | 2.373(6) | O(3)-Sm(1)-O(4) | 80.0(3)  | O(4)-Sm(1)-O(2) | 69.8(2)  | O(2)-Sm(1)-O(1) | 69.2(2)  |
| Sm(1)-O(4)      | 2.348(7) | O(3)-Sm(1)-O(6) | 134.9(2) | O(6)-Sm(1)-O(2) | 125.0(3) | O(3)-Sm(1)-N(1) | 146.1(3) |
| Sm(1)-O(6)      | 2.465(6) | O(4)-Sm(1)-O(6) | 73.7(2)  | O(5)-Sm(1)-O(2) | 133.9(3) | O(4)-Sm(1)-N(1) | 84.9(3)  |
| Sm(1)-O(5)      | 2.480(7) | O(3)-Sm(1)-O(5) | 69.2(3)  | O(3)-Sm(1)-O(1) | 79.0(2)  | O(6)-Sm(1)-N(1) | 67.1(3)  |
| Sm(1)-O(2)      | 2.455(6) | O(4)-Sm(1)-O(5) | 74.7(3)  | O(4)-Sm(1)-O(1) | 137.2(2) | O(5)-Sm(1)-N(1) | 135.0(2) |
| Sm(1)-O(1)      | 2.413(5) | O(6)-Sm(1)-O(5) | 68.8(2)  | O(6)-Sm(1)-O(1) | 143.0(2) | O(2)-Sm(1)-N(1) | 69.9(2)  |
| Sm(1)-N(1)      | 2.598(8) | O(3)-Sm(1)-O(2) | 76.4(2)  | O(5)-Sm(1)-O(1) | 129.7(3) | O(1)-Sm(1)-N(1) | 92.2(2)  |
| Sm(1)-N(2)      | 2.640(7) | O(1)-Sm(1)-N(3) | 67.2(2)  | N(3)-Sm(1)-N(1) | 124.4(2) | O(2)-Sm(1)-N(2) | 112.0(2) |
| Sm(1)-N(3)      | 2.598(8) | O(2)-Sm(1)-N(3) | 134.2(2) | O(4)-Sm(1)-N(2) | 141.4(3) | O(6)-Sm(1)-N(2) | 75.2(2)  |
| O(4)-Sm(1)-N(3) | 144.9(3) | O(6)-Sm(1)-N(3) | 98.6(3)  | O(3)-Sm(1)-N(2) | 138.5(2) | O(5)-Sm(1)-N(2) | 114.1(3) |
| O(3)-Sm(1)-N(3) | 82.5(2)  | O(5)-Sm(1)-N(3) | 70.7(3)  | O(1)-Sm(1)-N(2) | 67.9(2)  | N(3)-Sm(1)-N(2) | 62.3(2)  |

**Table S3** Spherical coordinates of the coordination polyhedron for Sparkle/PM7 optimized structure of Sm(fod)<sub>3</sub>(bath).

| PM7     | R (Å)   | (θ) <sup>°</sup> | (Φ) <sup>°</sup> |
|---------|---------|------------------|------------------|
| Sm      | 0.00000 | 0.000            | 0.000            |
| O(fod)  | 2.36710 | 127.268          | 141.708          |
| O(fod)  | 2.38630 | 69.189           | 169.630          |
| O(fod)  | 2.39881 | 71.238           | 75.233           |
| O(fod)  | 2.37450 | 117.103          | 29.911           |
| O(fod)  | 2.39597 | 83.535           | 318.984          |
| O(fod)  | 2.38194 | 134.487          | 275.823          |
| N(bath) | 2.55029 | 67.658           | 250.980          |
| N(bath) | 2.54781 | 15.632           | 328.248          |

**Table S4** Spherical coordinates of the coordination polyhedron for Sparkle/PM7 optimized structure of Sm(fod)<sub>3</sub>(terpy).

| PM7      | R (Å)   | (θ) <sup>o</sup> | (Φ) <sup>o</sup> |
|----------|---------|------------------|------------------|
| Sm       | 0.00000 | 0.000            | 0.000            |
| O(fod)   | 2.40388 | 59.915           | 164.901          |
| O(fod)   | 2.41111 | 41.057           | 247.030          |
| O(fod)   | 2.40190 | 153.754          | 5.303            |
| O(fod)   | 2.40057 | 100.217          | 54.938           |
| O(fod)   | 2.40667 | 73.306           | 332.187          |
| O(fod)   | 2.39699 | 31.306           | 40.243           |
| N(terpy) | 2.55398 | 132.257          | 192.496          |
| N(terpy) | 2.55291 | 103.611          | 259.348          |
| N(terpy) | 2.55751 | 108.835          | 121.083          |

**Table S5** SHAPE measured deviations from ideal eight coordinate geometries of [Sm(fod)<sub>3</sub>(bath)] complex.

| S. No. | SHAPE                                      | Symmetry        | Deviation [Sm(fod) <sub>3</sub> (bath)] |
|--------|--------------------------------------------|-----------------|-----------------------------------------|
| 1      | Octagon                                    | D <sub>8h</sub> | 30.111                                  |
| 2      | Heptagonal pyramid                         | C <sub>7v</sub> | 20.939                                  |
| 3      | Hexagonal bipyramid                        | D <sub>6h</sub> | 16.673                                  |
| 4      | Cube                                       | O <sub>h</sub>  | 10.484                                  |
| 5      | Square antiprism                           | D <sub>4d</sub> | <b>0.691</b>                            |
| 6      | Triangular dodecahedron                    | D <sub>2d</sub> | 2.100                                   |
| 7      | Johnson gyrobifastigium J26                | D <sub>2d</sub> | 15.093                                  |
| 8      | Johnson elongated triangular bipyramid J14 | D <sub>3h</sub> | 27.657                                  |
| 9      | Biaugmented trigonal prism J50             | C <sub>2v</sub> | 3.014                                   |
| 10     | Biaugmented trigonal prism                 | C <sub>2v</sub> | 2.336                                   |
| 11     | Snub diphenooid J84                        | D <sub>2d</sub> | 4.907                                   |
| 12     | Triakis tetrahedron                        | T <sub>d</sub>  | 11.178                                  |
| 13     | Elongated trigonal bipyramid               | D <sub>3h</sub> | 22.917                                  |

**Table S6** SHAPE measured deviations from ideal nine coordinate geometries of Sm(fod)<sub>3</sub>(terpy) complex.

| S. No. | SHAPE                              | Symmetry        | Deviation<br>[Sm(fod) <sub>3</sub> (terpy)] |
|--------|------------------------------------|-----------------|---------------------------------------------|
| 1      | Enneagon                           | D <sub>9h</sub> | 36.838                                      |
| 2      | Octagonal pyramid                  | C <sub>8v</sub> | 21.070                                      |
| 3      | Heptagonal bipyramid               | D <sub>7h</sub> | 16.693                                      |
| 4      | Johnson triangular cupola J3       | C <sub>3v</sub> | 15.792                                      |
| 5      | Capped cube J8                     | C <sub>4v</sub> | 9.737                                       |
| 6      | Spherical-relaxed capped cube      | C <sub>4v</sub> | 8.422                                       |
| 7      | Capped square antiprism J10        | C <sub>4v</sub> | 2.206                                       |
| 8      | Spherical capped square antiprism  | C <sub>4v</sub> | 1.153                                       |
| 9      | Tricapped trigonal prism J51       | D <sub>3h</sub> | 2.833                                       |
| 10     | Spherical tricapped trigonal prism | D <sub>3h</sub> | 1.328                                       |
| 11     | Tridiminished icosahedron J63      | C <sub>3v</sub> | 11.538                                      |
| 12     | Hula-hoop                          | C <sub>2v</sub> | 11.491                                      |
| 13     | Muffin                             | C <sub>S</sub>  | <b>1.029</b>                                |

**Table S7** SHAPE measured deviations from ideal eight coordinate geometry in Sparkle/PM7 predicted Sm(fod)<sub>3</sub>(bath) complex.

| S.No. | SHAPE                                      | Symmetry        | Deviation<br>[Sm(fod) <sub>3</sub> (bath)] |
|-------|--------------------------------------------|-----------------|--------------------------------------------|
| 1     | Octagon                                    | D <sub>8h</sub> | 30.397                                     |
| 2     | Heptagonal pyramid                         | C <sub>7v</sub> | 20.296                                     |
| 3     | Hexagonal bipyramid                        | D <sub>6h</sub> | 16.954                                     |
| 4     | Cube                                       | O <sub>h</sub>  | 9.790                                      |
| 5     | Square antiprism                           | D <sub>4d</sub> | <b>1.405</b>                               |
| 6     | Triangular dodecahedron                    | D <sub>2d</sub> | 3.153                                      |
| 7     | Johnson gyrobifastigium J26                | D <sub>2d</sub> | 15.747                                     |
| 8     | Johnson elongated triangular bipyramid J14 | D <sub>3h</sub> | 26.165                                     |
| 9     | Biaugmented trigonal prism J50             | C <sub>2v</sub> | 3.858                                      |
| 10    | Biaugmented trigonal prism                 | C <sub>2v</sub> | 3.123                                      |
| 11    | Snub diphenoid J84                         | D <sub>2d</sub> | 6.103                                      |

**Table S8** SHAPE measured deviations from ideal seven coordinate geometries in Sparkle/PM7 predicted Sm(fod)<sub>3</sub>(terpy) complex.

| S. No. | SHAPE                              | Symmetry        | Deviation<br>[Sm(fod) <sub>3</sub> (terpy)] |
|--------|------------------------------------|-----------------|---------------------------------------------|
| 1      | Enneagon                           | D <sub>9h</sub> | 33.356                                      |
| 2      | Octagonal pyramid                  | C <sub>8v</sub> | 21.936                                      |
| 3      | Heptagonal bipyramid               | D <sub>7h</sub> | 15.128                                      |
| 4      | Johnson triangular cupola J3       | C <sub>3v</sub> | 16.005                                      |
| 5      | Capped cube J8                     | C <sub>4v</sub> | 7.891                                       |
| 6      | Spherical-relaxed capped cube      | C <sub>4v</sub> | 6.570                                       |
| 7      | Capped square antiprism J10        | C <sub>4v</sub> | 3.777                                       |
| 8      | Spherical capped square antiprism  | C <sub>4v</sub> | 2.565                                       |
| 9      | Tricapped trigonal prism J51       | D <sub>3h</sub> | 5.234                                       |
| 10     | Spherical tricapped trigonal prism | D <sub>3h</sub> | 2.979                                       |
| 11     | Tridiminished icosahedron J63      | C <sub>3v</sub> | 11.088                                      |
| 12     | Hula-hoop                          | C <sub>2v</sub> | 8.461                                       |
| 13     | Muffin                             | C <sub>S</sub>  | <b>1.493</b>                                |
